# Supplementary material for: A comparison of high throughput core–shell 2D electrospinning and 3D centrifugal spinning techniques to produce platelet lyophilisate-loaded fibrous scaffolds and their effects on skin cells
Source: Royal Society of Chemistry journal article supplement (doi:10.1039/c7ra08728d), 2017-01-01
Supplement: c7ra08728d1.pdf [file c7ra08728d1.pdf]

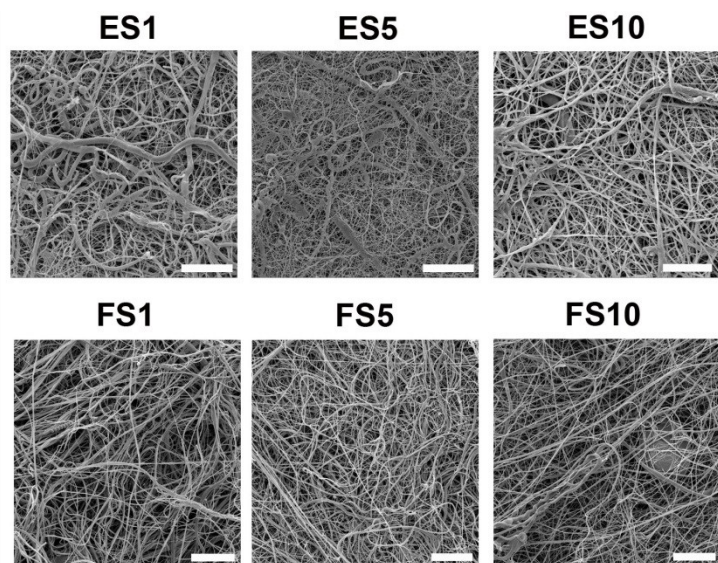

Figure S1. SEM images used for scaffold characterisation. Electrospun samples (ES1, ES5, ES10, and ES Control) magnification 2000x, scale bar 20  $\mu\text{m}$ ; forcespun samples (FS1, FS5, FS10, and FS Control) magnification 650x, scale bar 50  $\mu\text{m}$ .

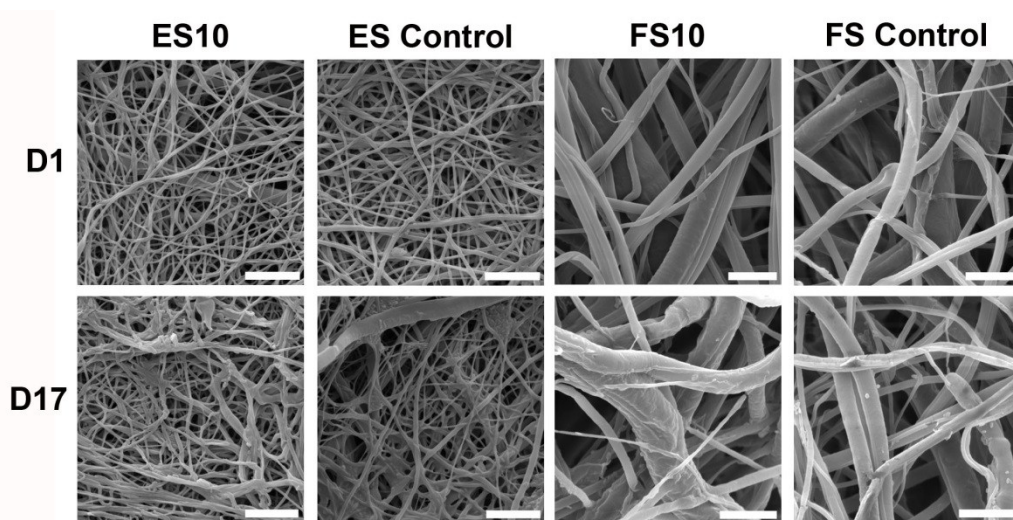

Figure S2. SEM images of scaffold degradation. The degradation changes of the scaffolds (control scaffolds and scaffolds containing 10% PF-68 were used to illustrate the changes; ES10 and FS10) assessed using SEM. The scaffolds were immersed for 17 days into aqueous solutions, fixed using glutaraldehyde and dehydrated. On day 17, degradation changes of the surface of the fibres were observed. Magnification 8000x, scale bar 5  $\mu\text{m}$ .
